# Supplementary material for: Hierarchical graphene–polyaniline nanocomposite films for high-performance flexible electronic gas sensors
Source: Royal Society of Chemistry journal article supplement (doi:10.1039/c6nr02540d), 2016-01-01
Supplement: c6nr02540d1.pdf [file c6nr02540d1.pdf]

Electronic Supplementary Material (ESI) for Nanoscale.  
This journal is © The Royal Society of Chemistry 2015

### **Hierarchical Graphene-Polyaniline Nanocomposite Films for High-Performance Flexible Electronic Gas Sensors**

Yunlong Guo,<sup>a</sup> Ting Wang,<sup>b</sup> Fanhong Chen,<sup>a</sup> Xiaoming Sun,<sup>a</sup> Xiaofeng Li,<sup>a</sup> Zhongzhen Yu,<sup>a</sup> Pengbo Wan<sup>\*a</sup> and Xiaodong Chen<sup>b</sup>

<sup>a</sup>State Key Laboratory of Chemical Resource Engineering,  
P.O. Box 98, Beijing University of Chemical Technology  
Beijing 100029, P.R. China  
E-mail: [pbwan@mail.buct.edu.cn](mailto:pbwan@mail.buct.edu.cn)

<sup>b</sup>School of Materials Science and Engineering  
Nanyang Technological University  
50 Nanyang Avenue, Singapore 639798, Singapore.

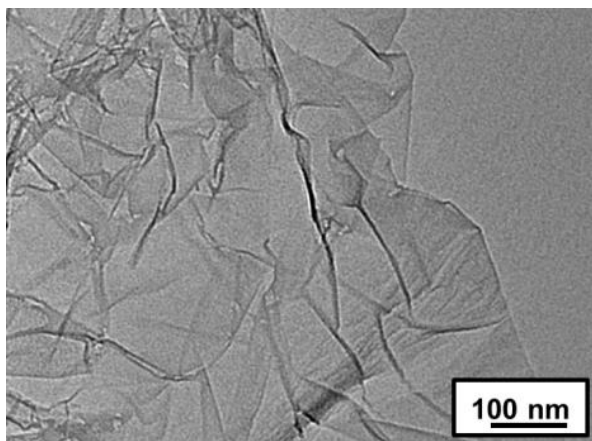

**Fig. S1** TEM image of GO.

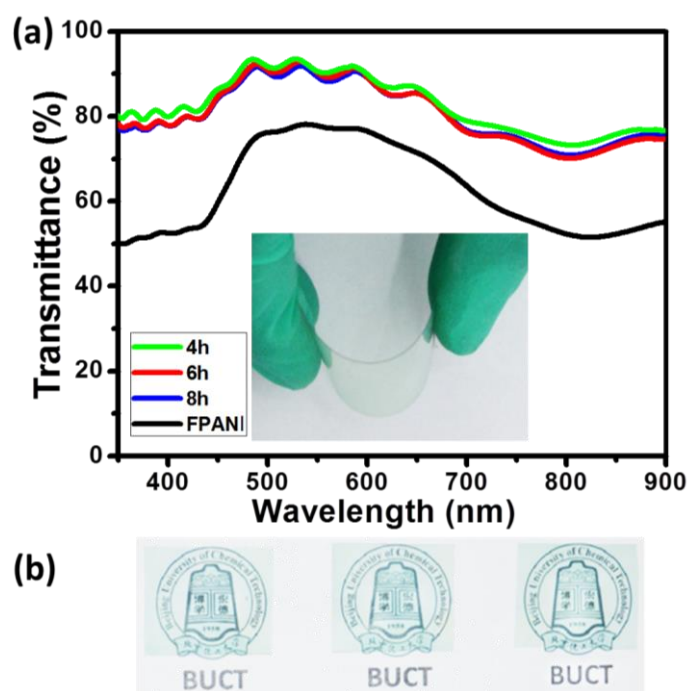

**Fig. S2** (a) Transmittance spectra of hierarchically nanostructured PPANI/rGO-FPANI network films with different reaction time at 4 h, 6 h, and 8 h, and the FPANI film with reaction time at 6 h, respectively. Inset: the flexible transparent PPANI/rGO-FPANI network film (6 h sample). (b) Photographs of the hierarchically nanostructured PPANI/rGO-FPANI network films with different reaction time at 4 h, 6 h, and 8 h (from left to right). The school badges are placed behind the films.

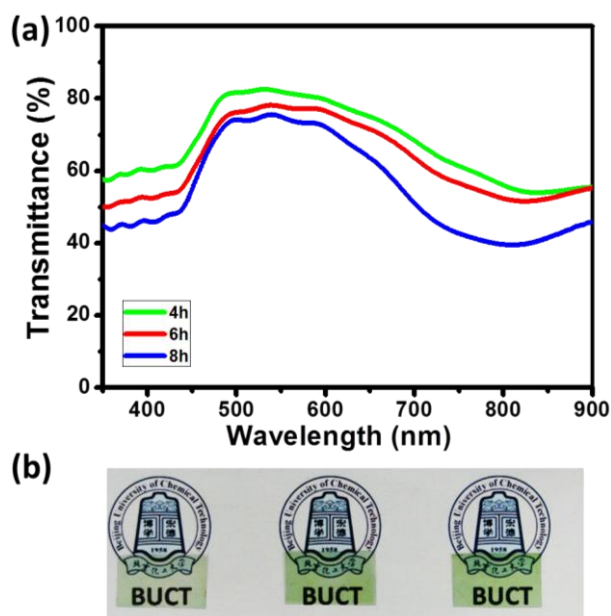

**Fig. S3** (a) Transmittance spectra of the FPANI films with different reaction time at 4 h, 6 h and 8 h, respectively. (b) Photographs of the FPANI films with different reaction time at 4 h, 6 h and 8 h (from left to right). The words “BUCT” are placed behind the films.

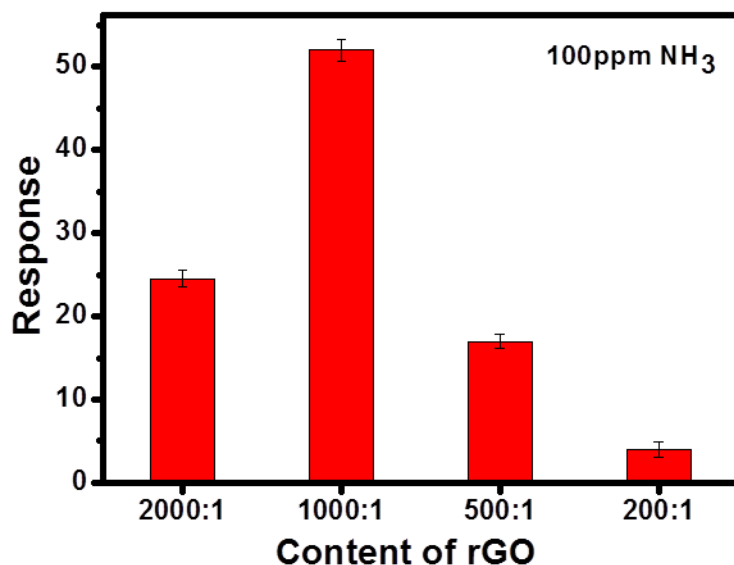

**Fig. S4** The influence of rGO content on the sensing properties (the weight feed ratio of aniline to rGO at 2000:1, 1000:1, 500:1, 200:1 at 6 h polymerization).

The influence of rGO content on the sensing properties (the weight feed ratio of aniline to rGO at 2000:1, 1000:1, 500:1, 200:1 at 6 h polymerization) was studied, as shown in Fig. S4. When the weight feed ratio of aniline to rGO at 2000:1, there are excessive FPANIs to form the covered dense films and less PPANI/rGO composite for limited adsorption/desorption of NH<sub>3</sub>, resulting in the lower response. While the weight feed ratio at 500:1 and 200:1, there are excessive PPANI/rGO composite connected by few FPANI with the less effectively exposed active surfaces of the sensing materials and less interconnected network, which restricts the charge transport and collection.

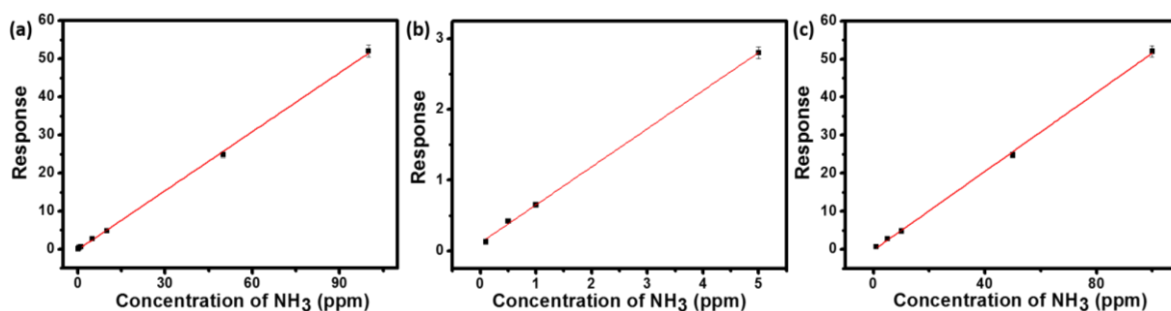

**Fig. S5** (a) The variation of sensor response of the PPANI/rGO-FPANI network film as a function of NH<sub>3</sub> gas concentrations from 100ppb to 100ppm. (b) The detailed variation of sensor response for (a) with the NH<sub>3</sub> concentrations from 100 ppb to 5000 ppb. (c) The detailed variation of sensor response for (a) with the NH<sub>3</sub> concentrations from 1 ppm to 100 ppm.

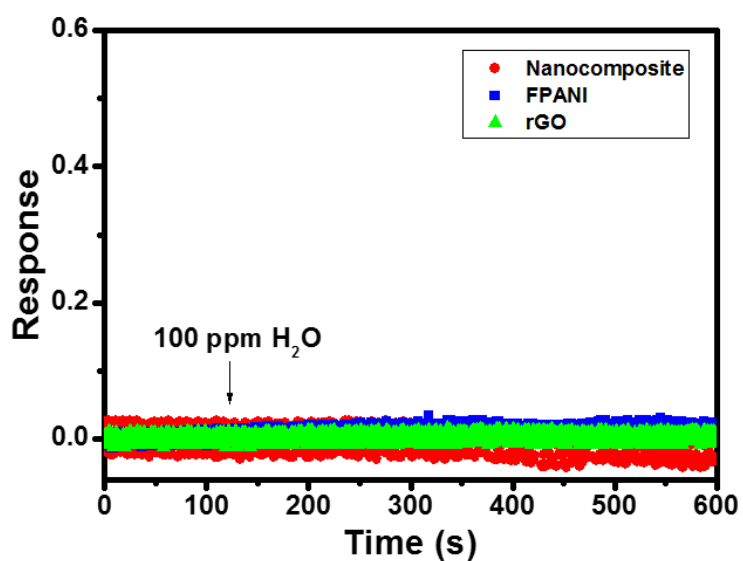

**Fig. S6** No obvious response observed for 100 ppm H<sub>2</sub>O in our experiment. In our experiment, the operating humidity range is 28-47%.

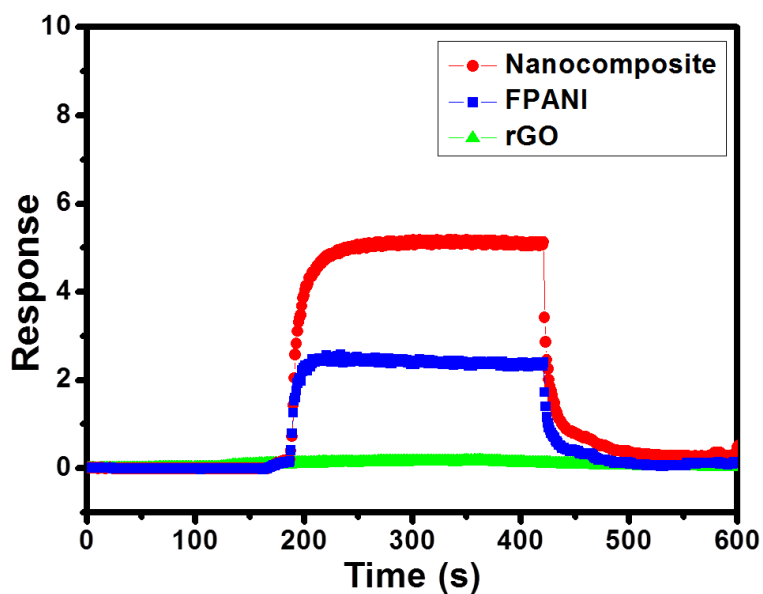

**Fig. S7** The field test for the rGO, the FPANI, and PPANI/rGO-FPANI nanocomposite network film sensors (6 h sample), respectively, to a mixture of ammonia with ethanol, dichloromethane and acetone in 10 ppm.
